# Supplementary material
Source: PubMed Central journal article supplement (PMC4054268)
Supplement: EC.00341-13_zek999094293so1.pdf [file EC.00341-13_zek999094293so1.pdf]

**A****TcBDF3**

MGSTGRKAVDEVNHWIAYIDCALSHPHPLPKGKHVFRSDLSTVPEVRDIYDCLYKLYAESASASAFREPVNALELGVFNYYEVVTEPMSLRTVLDRIAEGGHYSQASQVLADVEKIWSNCE

KYNGADSALVKEAKKCGI LARLRERLAEEQPAPNAELDKIISAFESADESVLGELAYFRREDPSLIISNGDVDLTALRVKHLKAMKAILERAMNGGGGRG

**B**

|                 |         |                  |                 |              |             |              |              |               |              |              |
|-----------------|---------|------------------|-----------------|--------------|-------------|--------------|--------------|---------------|--------------|--------------|
| <b>TcBDF1</b>   | RDEVHRL | LENSFYRECRSVLNAV | MVKQDENGIFASN-  | PAALPEYVLM   | SRPIWVKLI   | SRRLDRY-EY   | GTKMEFLHDMRL | VIDNCYAYNGEVS | VVAALGRRLEVV | MEDLDFVTKL   |
| <b>TcBDF2</b>   | KRGREGI | LDKARCLAFVHQLW   | DKDKLKFHHPVS--  | AAELPDYHKA   | NYPVDLSTIR  | QGIESG-TYDS  | DADVQNAVAQMI | ANALEYNAKGT   | FWHHQALSFRN  | IYLDVARQCG   |
| <b>TcBDF3</b>   | SDLSTV  | EVVRDIYDCLYKLY   | AESASASAFREPV   | NALELGVFNYYE | VVTEPMSLRTV | LDRIAEGGHYSQ | ASQVLADVEKI  | WSNCEKYN      | GADSLVKEAKK  | CGILARLRERLA |
| <b>TcBDF4</b>   | IKRRVLR | RRRRLIRAVDEVWR   | AGKDAADFLLPVT-- | EREAPDYRRVR  | QPVCIASIYCS | VWDA-EVEDY   | AGLKAFTLMRS  | NCELYNGAGS    | PLVAACQGL    | VRVGFRAAREAQ |
| <b>DmBrahma</b> | DKRSKK  | MHKIMS           | AVIKHNQIGRTLSE  | FMKLP        | --RQRLPDY   | EITKRPV      | DKKILQRIEDC  | -KYADLNELEK   | DFMQLCNAQI   | YNEEASLIYLD  |
| <b>HsGCN5</b>   | ELKDPD  | QLYTTLKNLLA      | QIKSHPSA-WF     | FMEPVK--KSE  | APDYEVIRFP  | DLKTMTERL    | RSR-YVTRK    | LFVADLQ       | RVIANCREYN   | FPDSEYCRCA   |
| <b>DmGCN5</b>   | ESTDPE  | KLATSFA          | SVLQSVRCHTTA-   | WFLR         | PVT--AAE    | VPDYDHIKYP   | MDLKTMG      | ERLKKG-Y      | YQTRRL       | FMA          |
| <b>ScGcn5p</b>  | PKRGP-- | HDAAIQ           | NILTELOHAAA-    | WF           | LQPVN--KEE  | VPDYDFIK     | PEMDLST      | MEIKLESN-     | KYQKME       | DFI          |
| <b>DmTAF1a</b>  | RTDPVV  | LSSILEI          | IHNE-LFS        | MPDVSE       | FLFPVS--    | AKKVPDY      | RVVTKPMD     | LQTMREY       | TRQF-RYT     | SREMF        |
| <b>DmTAF1b</b>  | DDDQV   | LSFIFDKL         | HSQ-IKQL        | PESWFL       | PKPVN--     | KKQVKD       | YTVIKR       | PMDLET        | IGKNIEAH-    | RYHSRAE      |
| <b>HsTAF1a</b>  | RTDPMV  | LSSILESI         | IIND-M          | DLPNTY       | FHTPVN--    | AKVVKD       | YKITT        | REMDL         | QTLREN       | VKRRLYPS     |
| <b>HsTAF1b</b>  | DDDQV   | FSFILD           | NIVTQKMM        | AVPDSW       | FFHHPVN--   | KKFV         | PDYKVI       | VNPM          | DLSTIR       | KNISKH-      |
| <b>ScBDF1a</b>  | IPKHQ   | ERHALLA          | IAKAVKRL        | KIAR---      | FLQ         | PVDPVKLD     | IPFENY       | IKR           | PMDLSTIER    | KNINVG-AYE   |
| <b>ScBDF1b</b>  | RLQQAM  | FCQSVL           | KELMAK          | KHASYN-Y     | FLE         | PVDPVSMN     | LPTFY        | FDYV          | KEPMDL       | GTI          |
| <b>ScBDF2a</b>  | LPPHQS  | YLLSS            | IKATKRL         | KIAR---      | FLK         | PVDP         | PIALNIP      | HFENY         | VQTPMD       | LSTIET       |
| <b>ScBDF2b</b>  | TLQKFF  | TCLKIL           | KVLM            | SKKNSDIN-    | FF          | LQPV         | DPIALN       | LPNY          | FDVVK        | NPM          |
| <b>ScSpt7p</b>  | ERIGQE  | ELYEACE          | KVLELRN         | YTEHST       | FLNK        | YS--KRE      | APNYHQI      | IKK           | SMDLNT       | VLKKISF-     |
| <b>AfSpt7</b>   | DKIGQE  | ELYEAAE          | KVLS            | SELKAMTE     | HSSAFL      | TRVN--       | KRD          | APDY          | TIHK         | PEMDL        |
| <b>HsSMCA4</b>  | NLT     | TKMK             | KIVDA           | VIK          | YK          | YDSSGR       | QLSEVFI      | QLPS--        | RKEL         | PEY          |
| <b>HsSMCA2</b>  | -----   | ---              | SQLE            | IEGNSS       | GR          | QLSEVFI      | QLPS--       | RKEL          | PEY          | ELIRK        |
| <b>ScSNF2</b>   | EKVAKQ  | ALDLYH           | FALNYE          | NAEGR        | KLSDI       | FLSK         | PS--KAL      | Y             | PDY          | YMI          |

$\alpha$ Z
 $\alpha$ A
 $\alpha$ B
 $\alpha$ C

**C**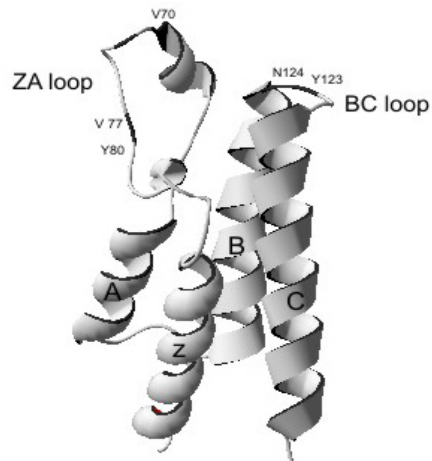**D**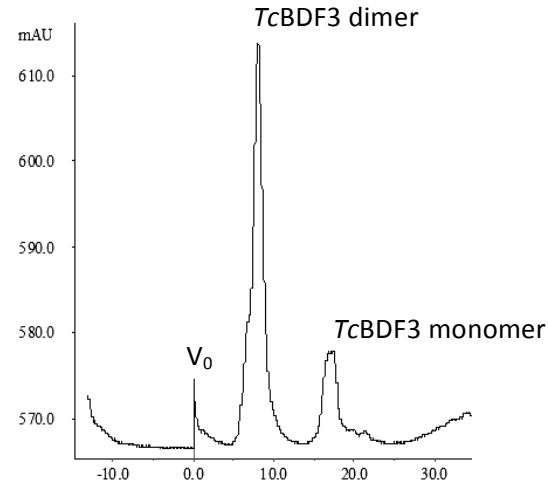

**Figure S1. Sequence analysis and dimeric state of TcBDF3.** (A) Aminoacidic sequence of TcBDF3. The bromodomain predicted by Pfam is on black background, the acidic region is on light blue background and the basic region is on green background. (B) Sequence alignment of known bromodomains. The sequences were aligned using ClustalW, identical residues are white on black background and conservative changes are black on yellow background. The bromodomain alpha-helices are marked with boxes. Asterisks (\*) indicate residues that are important for the interaction with acetylated lysine residues. Several bromodomain-containing proteins have two bromodomain modules in tandem. In those cases, both were included in the alignment and were differentiated as “a” –N-terminal domain– and “b” –C-terminal domain–. The sequences are (species name; GenBank accession number or TriTrypDB accession number): *DmBrahma* (*Drosophila melanogaster*; P25439), *HsSMCA4* (*Homo sapiens*; P51532), *HsSMCA2* (*H. sapiens*; P51531), *DmGCN5* (*D. melanogaster*; AAC39102.1), *HsGCN5* (*H. sapiens*; AAC39769.1), *ScGcn5p* (*Saccharomyces cerevisiae*; NP\_011768.1), *ScBDF1a* and *ScBDF1b* (*S. cerevisiae*; P35817), *ScBDF2a* and *ScBDF2b* (*S. cerevisiae*; YDL070W), *DmTAF1a* (TAFII250) and *DmTAF1b* (TAFII250) (*D. melanogaster*; P51123), *HsTAF1a* (TAFII250) and *HsTAF1b* (TAFII250) (*H. sapiens*; P21675), *ScSpt7* (*S. cerevisiae*; NP\_009637.1), *AfSpt7* (*Aspergillus fumigatus*; XP\_754519.1), *TcBDF1* (*Trypanosoma cruzi*; TcCLB.506247.80), *TcBDF2* (*T. cruzi*; TcCLB.506553.20), *TcBDF3* (*T. cruzi*; TcCLB.510719.70), *TcBDF4* (*T. cruzi*; TcCLB.504213.70). (C) Secondary structure of TcBDF3 modelled by the Phyre server. The conserved residues that are important for the interaction with acetylated residues in other known bromodomains are indicated, as well as the four alpha helices ( $\alpha$ A,  $\alpha$ B,  $\alpha$ C and  $\alpha$ Z) and the ZA and BC loops. (D) Determination of the multimeric state of TcBDF3 by size exclusion chromatography.  $V_0$ , void volume, determined using dextran blue. The standard curve was constructed using: Lisozime (14,7 kDa), GST (27 kDa for the monomeric form and 54 kDa for the dimeric form) and Bovine Serum Albumin (67 kDa) (not shown).

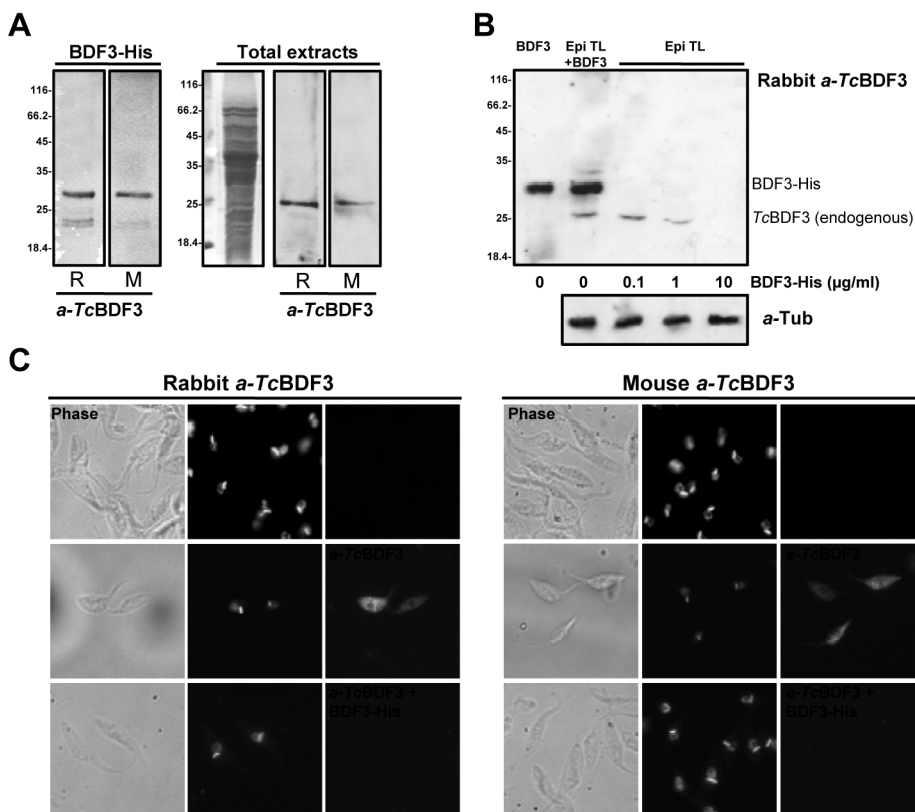

**Figure S2. Anti-TcBDF3 antibodies raised in rabbit and mouse are specific and do not cross react with other *T. cruzi* bromodomains.** (A) Western blot analysis with rabbit (R) and mouse (M) anti-TcBDF3

antibodies (*a-TcBDF3*). Recombinant *TcBDF3* (BDF3-His) and total protein extracts were tested. (B) Western blot analysis with rabbit anti-*TcBDF3* antibodies competed with different amounts of recombinant *TcBDF3* in total lisates from epimastigotes (Epi TL). Recombinant *TcBDF3* (BDF3) and total lisates from epimastigotes supplemented with BDF3-His were also blotted (Epi TL+BDF3). Mouse anti- $\alpha$  tubulin (*a-Tub*) was used as a loading control. (C) Immunofluorescence assays in epimastigotes using rabbit and mouse pre-immune sera, purified anti-*TcBDF3* antibodies and anti-*TcBDF3* antibodies competed with 1  $\mu$ g/ml of recombinant *TcBDF3*. Anti-rabbit IgG conjugated to Fluorescein was used as secondary antibody. Nucleus and kinetoplast were labelled with DAPI.

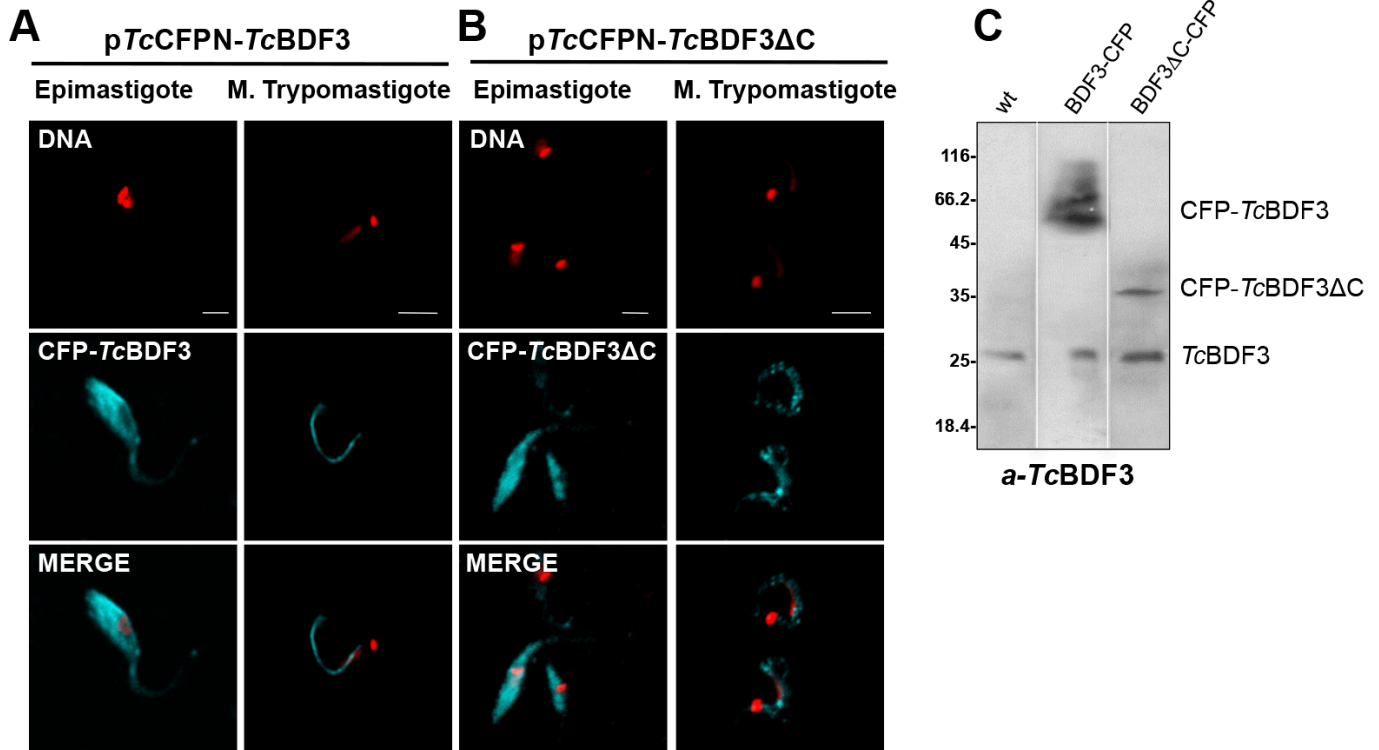

**Figure S3: Truncated *TcBDF3* miss-localizes in metacyclic trypomastigotes.** CFP-*TcBDF3* (A) and CFP-*TcBDF3*ΔC (B) localization (cyan) in epimastigotes and metacyclic trypomastigotes was determined by confocal microscopy. Nucleus and kinetoplast was stained with propidium iodide (red) (DNA). Bars = 2  $\mu$ m. (C) Western blot analysis of epimastigotes total extracts of: Dm28c (wt), Dm28c pTcCFPN-*TcBDF3* (BDF3-CFP) and Dm28c pTcCFPN-*TcBDF3*ΔC (BDF3ΔC-CFP). Endogenous *TcBDF3*, CFPN-*TcBDF3* and CFPN-*TcBDF3*ΔC were detected with anti-*TcBDF3* antibodies.
